# Supplementary material for: Influence of EGFR-activating mutations on sensitivity to tyrosine kinase inhibitors in a KRAS mutant non-small cell lung cancer cell line
Source: PubMed Central journal article supplement (PMC7055889; doi:10.1371/journal.pone.0229712), 2020-03-04
Supplement: pone.0229712.s003.pdf [file pone.0229712.s003.pdf]

**A**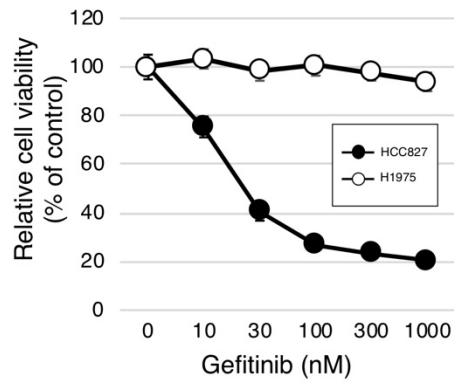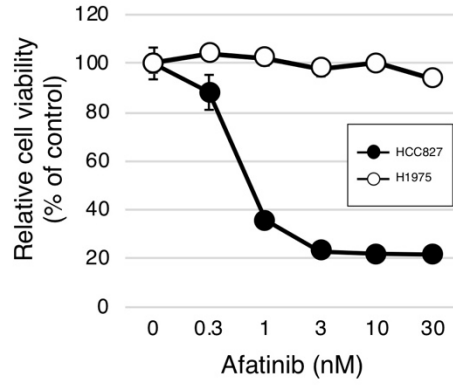**B**

| IC50           | HCC827 | H1975  |
|----------------|--------|--------|
| Gefitinib (nM) | 24.6   | > 1000 |
| Afatinib (nM)  | 0.81   | > 30   |

**C**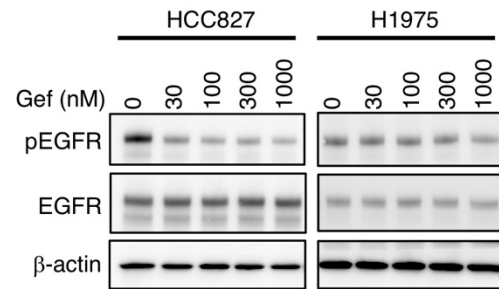**Fig. S3**
