# Supplementary material for: Influence of EGFR-activating mutations on sensitivity to tyrosine kinase inhibitors in a KRAS mutant non-small cell lung cancer cell line
Source: PubMed Central journal article supplement (PMC7055889; doi:10.1371/journal.pone.0229712), 2020-03-04
Supplement: pone.0229712.s004.pdf [file pone.0229712.s004.pdf]

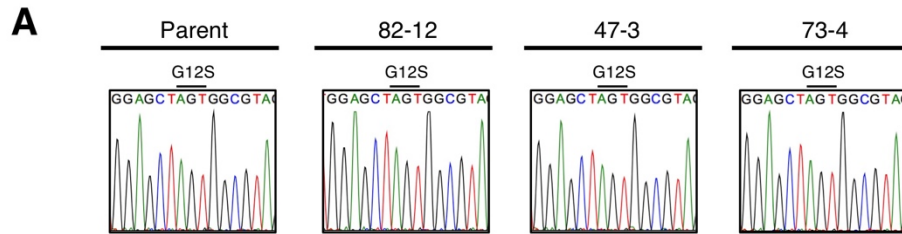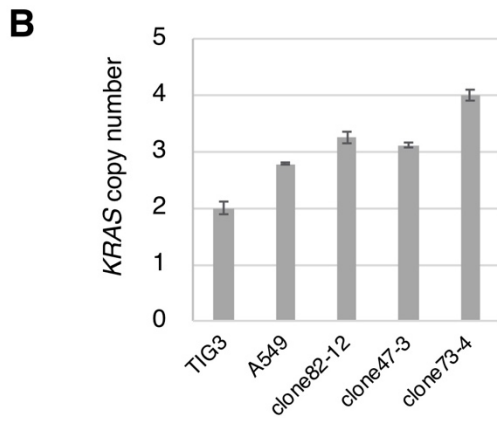

**Fig. S4**
